# Supplementary material
Source: ML conference proceedings conference paper supplement (https://openreview.net/forum?id=aJDGfynRw7)
Supplement: supplementary_material [file attachment]

**All code is implemented on** **Ceka platform and the version of Ceka platform is 1.0.1**

IWBVT.java is the code for the approach proposed in the paper, and Test_S.java and Test_R.java are the codes used to test the experiment on the simulated and real-world datasets, respectively. CekaUtils.java provides some functions used in the Test_S.java and Test_R.java. IWBVT_noBVT.java and IWBVT_noIW.java are the codes of two competitors in ablation experiments. Test_R_Ablation.java is the code for ablation experiments. Test_BVT.java is the code for observing the bias and variance of models. LinearRegression.java is the code for linear regression. BVDcrossvalx.java, CallableBVDCrossvalx.java, and SUtils.java provide some functions used to calculate the bias and variance of models.

1. **Implement the experiments on simulated datasets (modified in Test_S.java).**
2. Modify the dataSetArffDir to the path where your simulated datasets are stored.


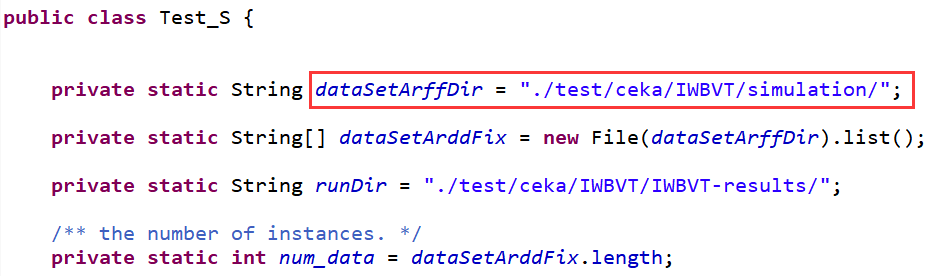


1. Modify the runDir to the path where your want to store the experiment results.


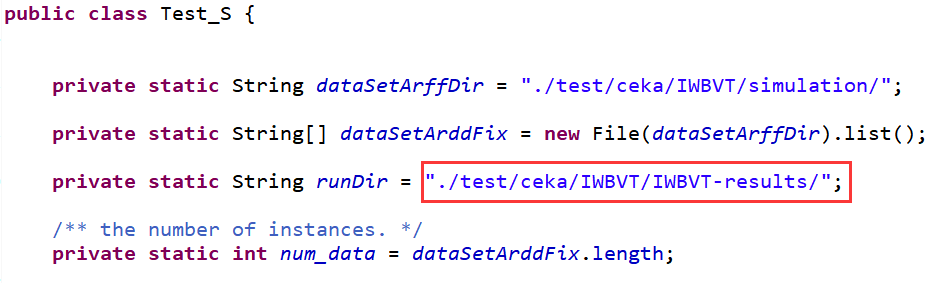


1. Run the code to get the results of the experiment.
2. **Implement the experiments on real-world datasets (modified in Test_R.java).**

The operations are almost identical to the ones on the simulation dataset, so we won't repeat them again here.

1. **Implement the ablation experiments on real-world datasets (modified in Test_R_Ablati- on.java).**

The operations are almost identical to the ones on the simulation dataset, so we won't repeat them again here.

1. **Implement the BVT experiments on real-world datasets (modified in Test_BVT.java and BVDcrossvalx.java).**
2. Modify the dataPath to the path where your datasets for testing bias-variance trade-off are stored.


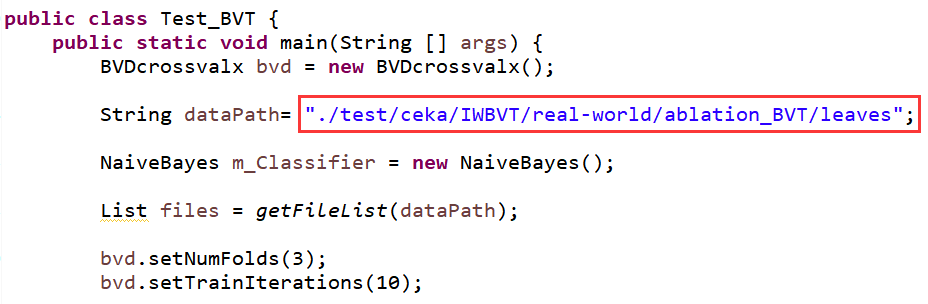


1. Modify the parameter of decompose() in BVDcrossvalx.java to the path where your files (in arff format) for testing bias-variance trade-off are stored.


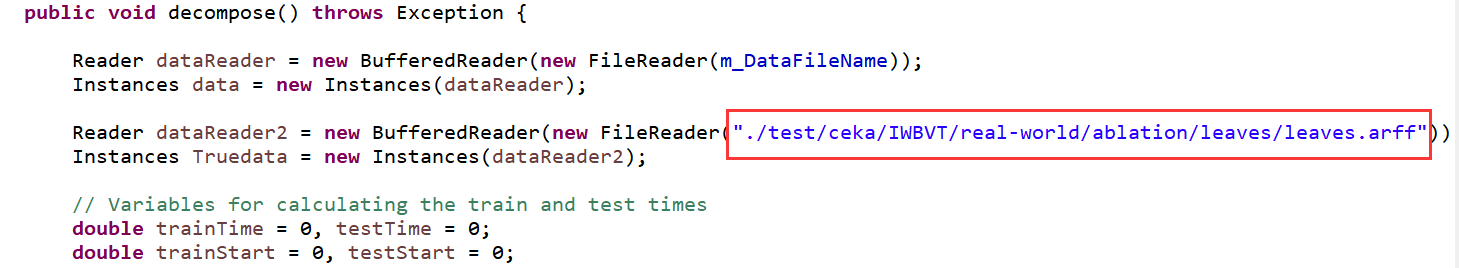


1. Run Test_BVT.java to get the results of the experiment.
